# Supplementary material for: A novel culture method that sustains ERα signaling in human breast cancer tissue microstructures
Source: Springer Nature journal article supplement (doi:10.1186/s13046-020-01653-4), 2020-08-17

Figure S1

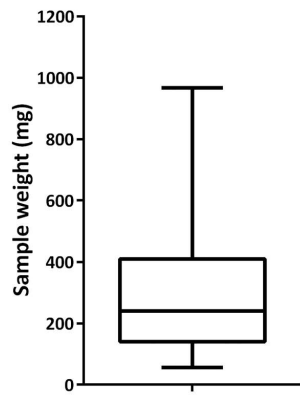

Supplement: MOESM1 [file 18288592]
